# Supplementary material
Source: publisher figshare collection journal article supplement (https://acs.figshare.com/ndownloader/files/3962212)
Supplement: Supplementary file 1 [file 3962212]

*Supporting Information*

**Divergent Synthesis and Tuning of the Electronic Structures of Cobalt-Dithiolene-Fullerene Complexes for Organic Solar Cells**

Yutaka Matsuo <sup>a\*</sup>, Keisuke Ogumi <sup>a</sup>, Masashi Maruyama <sup>a</sup>, and Takafumi Nakagawa <sup>a</sup>

<sup>a</sup> *Department of Chemistry, School of Science, The University of Tokyo  
7-3-1 Hongo, Bunkyo-ku, Tokyo 113-0033, Japan*

E-mail: matsuo@chem.s.u-tokyo.ac.jp

**– Table of Contents –**

|                                                                |       |
|----------------------------------------------------------------|-------|
| UV-vis absorption spectra for <b>4</b> , <b>5</b> and <b>7</b> | S2    |
| <i>J-V</i> curves for the solar cells using <b>9</b>           | S3    |
| NMR spectra for <b>3–9</b>                                     | S4–10 |

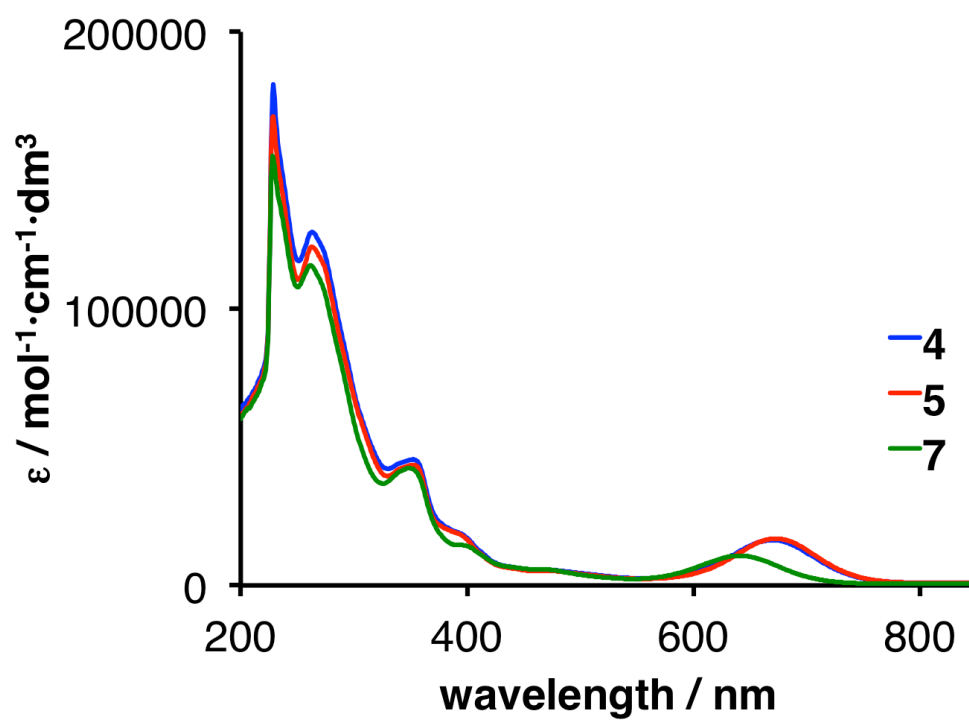

**Figure S1.** UV-vis absorption spectra for **4**, **5** and **7** in  $\text{CH}_2\text{Cl}_2$ .

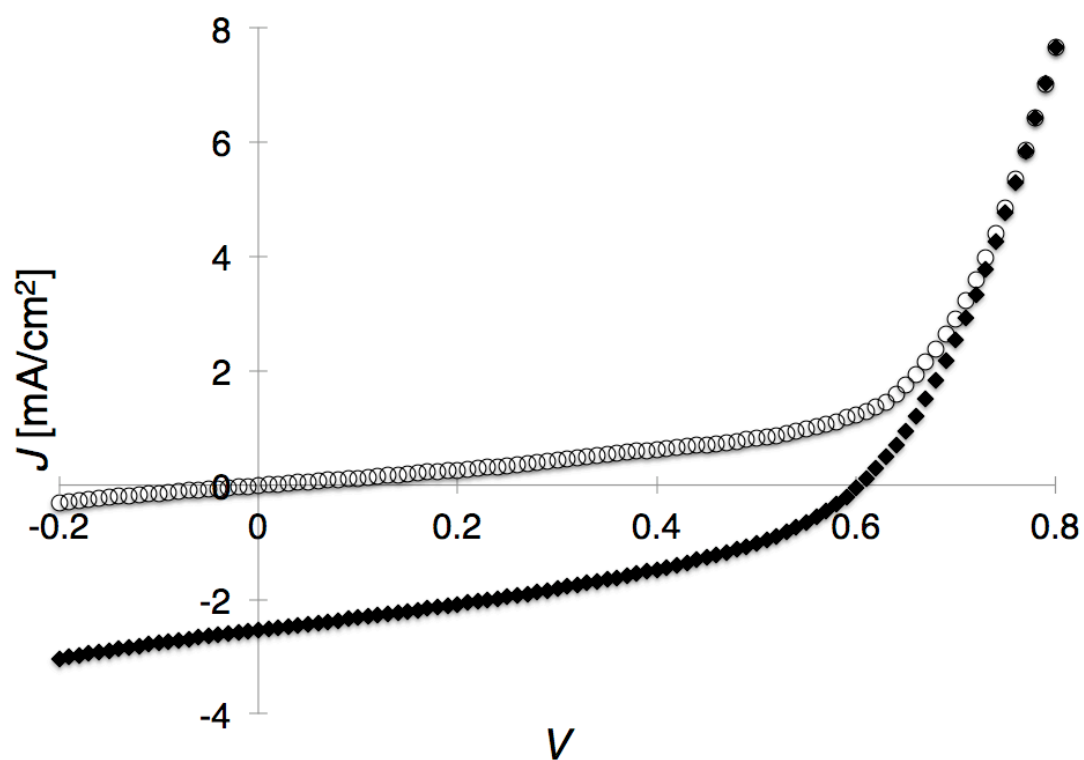

**Figure S2.**  $J$ - $V$  curves for devices, glass/ITO/PEDOT:PSS/BP:9/Ca/Al, measured under AM 1.5G illumination ( $100 \text{ mW/cm}^2$ , 1 sun).

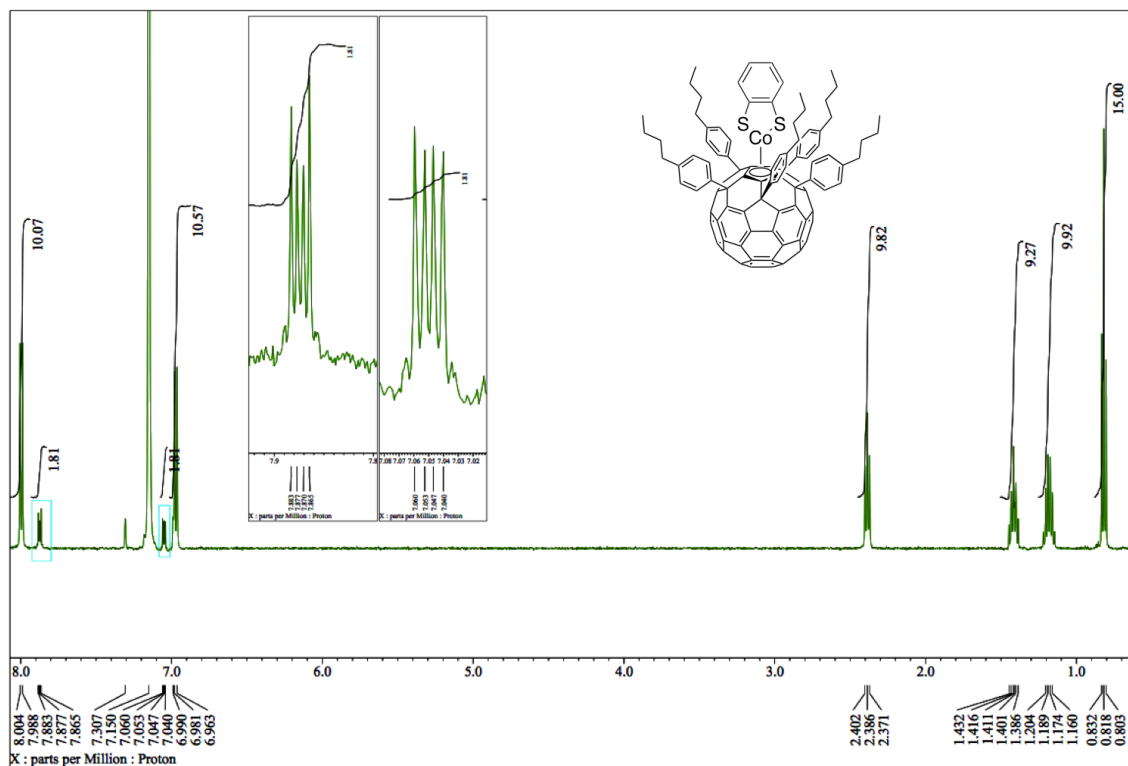

Figure S3.  $^1\text{H}$  NMR chart for 3.

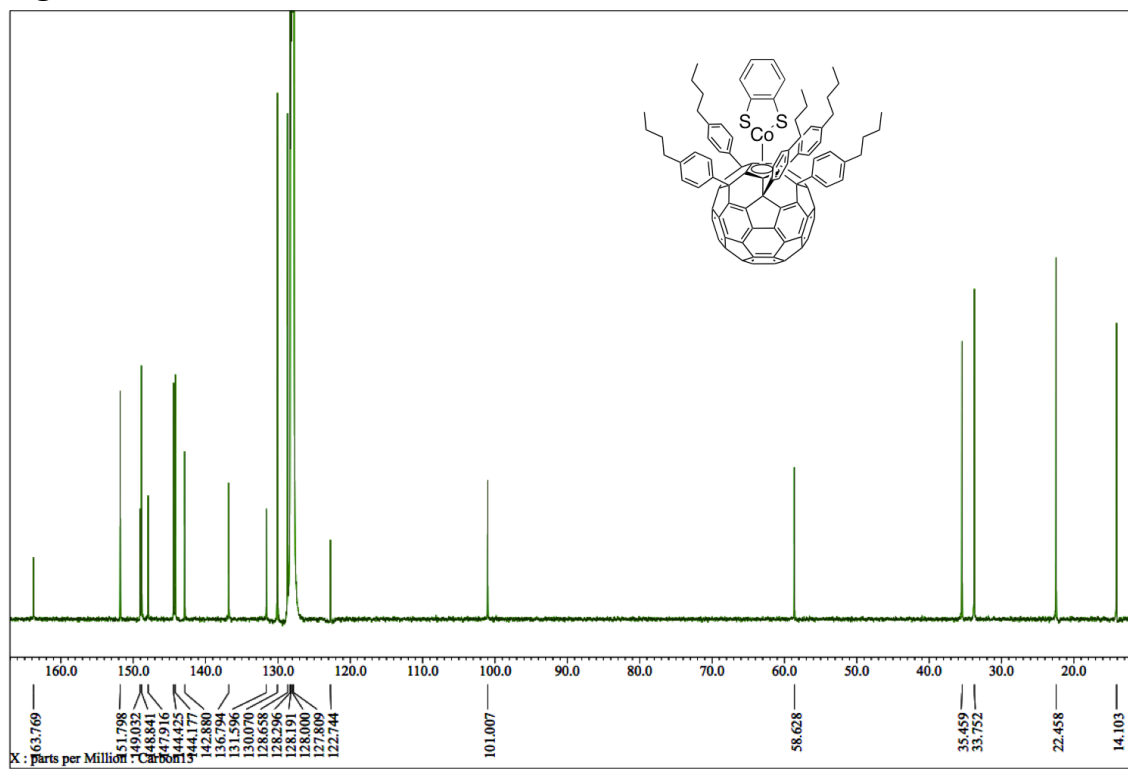

Figure S4.  $^{13}\text{C}$  NMR chart for 3.

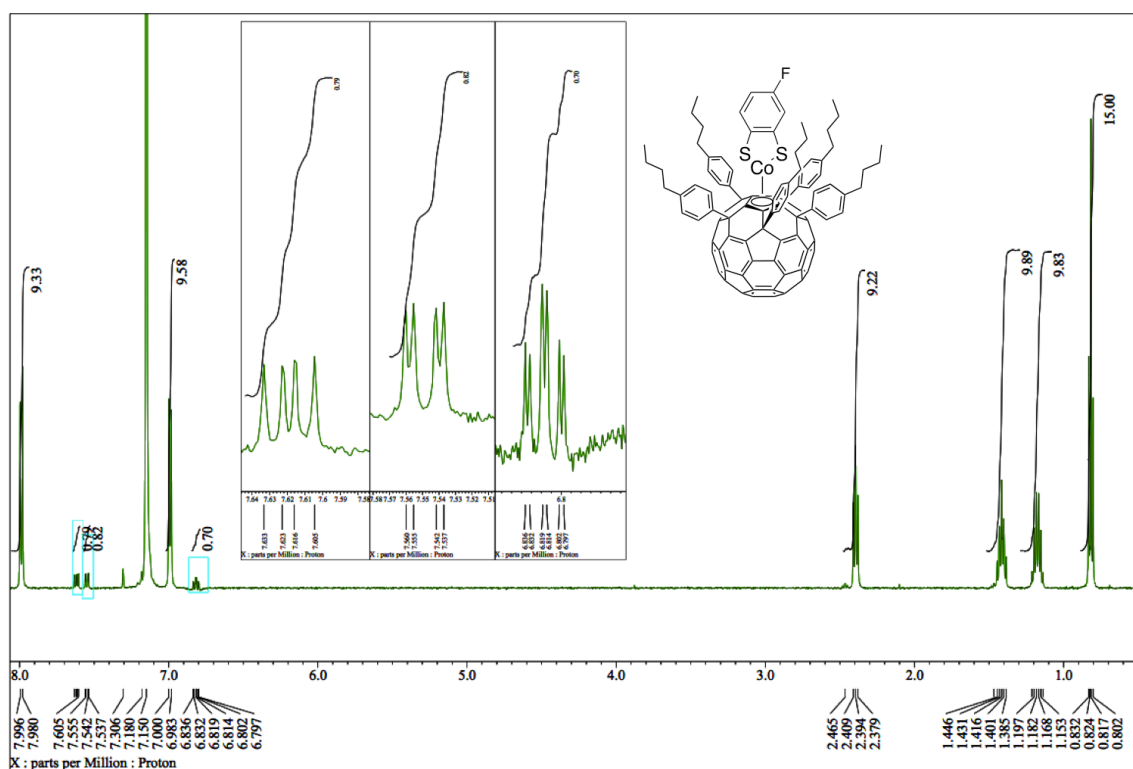

**Figure S5.** <sup>1</sup>H NMR chart for 4.

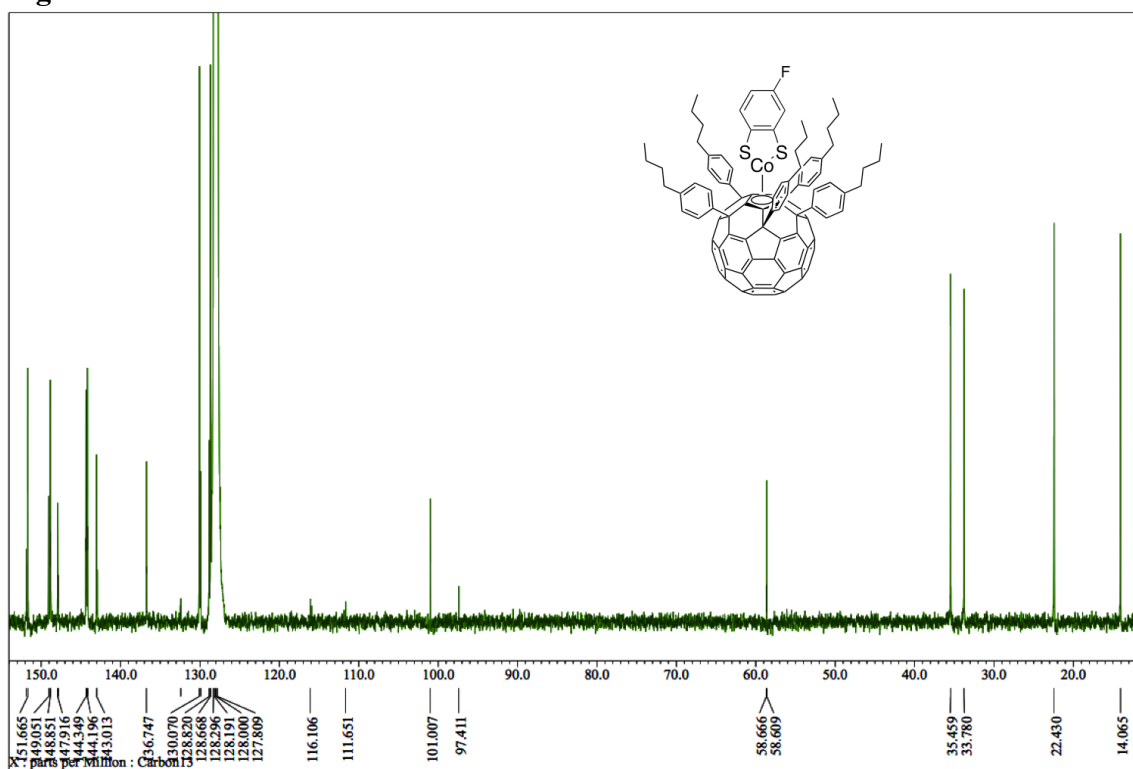

**Figure S6.** <sup>13</sup>C NMR chart for 4.

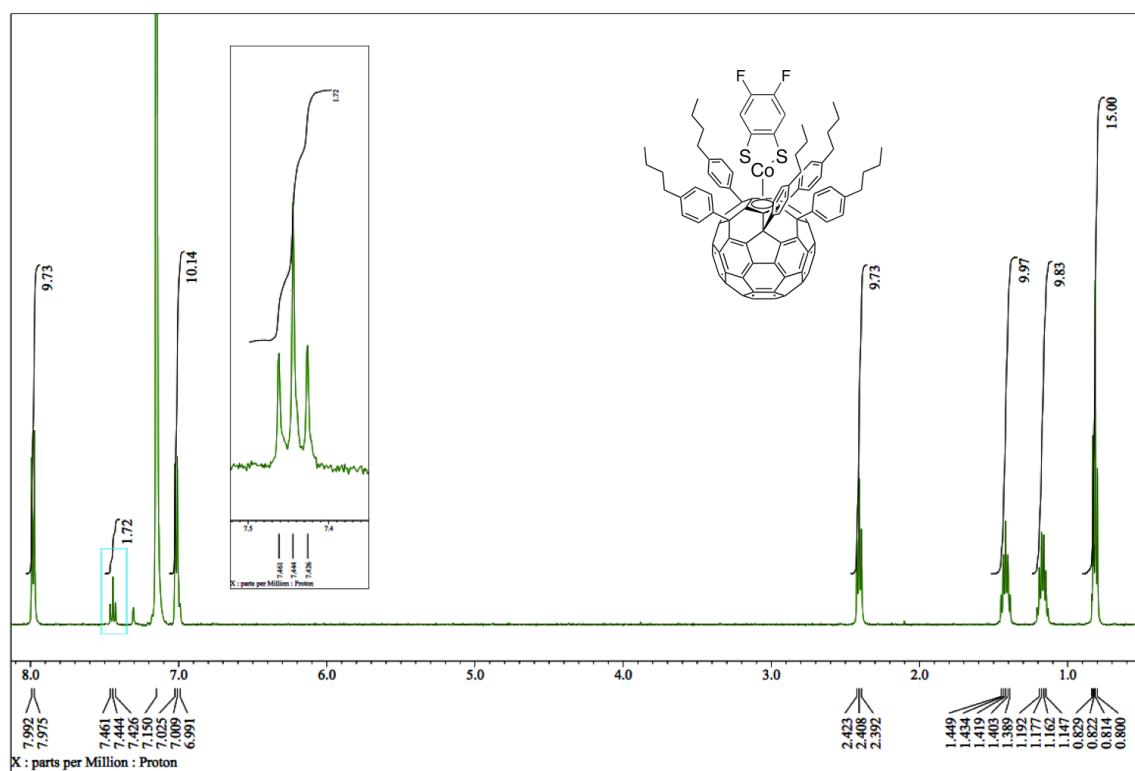

**Figure S7.** <sup>1</sup>H NMR chart for **5**.

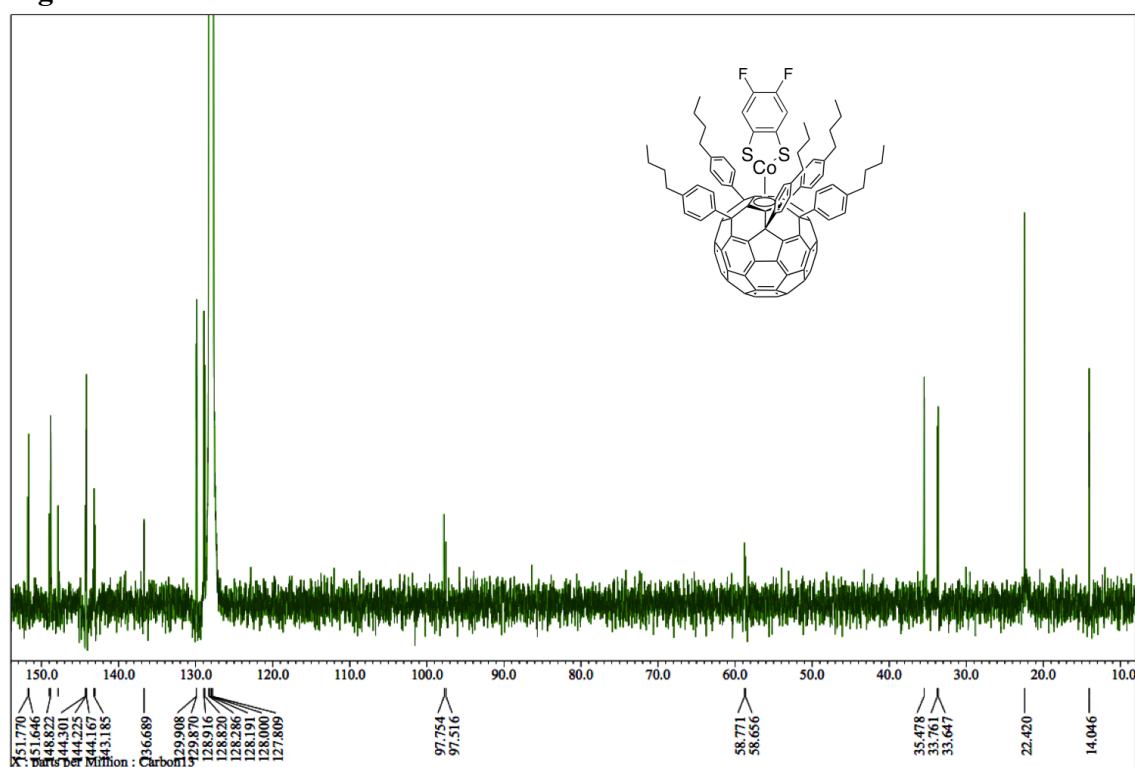

**Figure S8.** <sup>13</sup>C NMR chart for **5**.

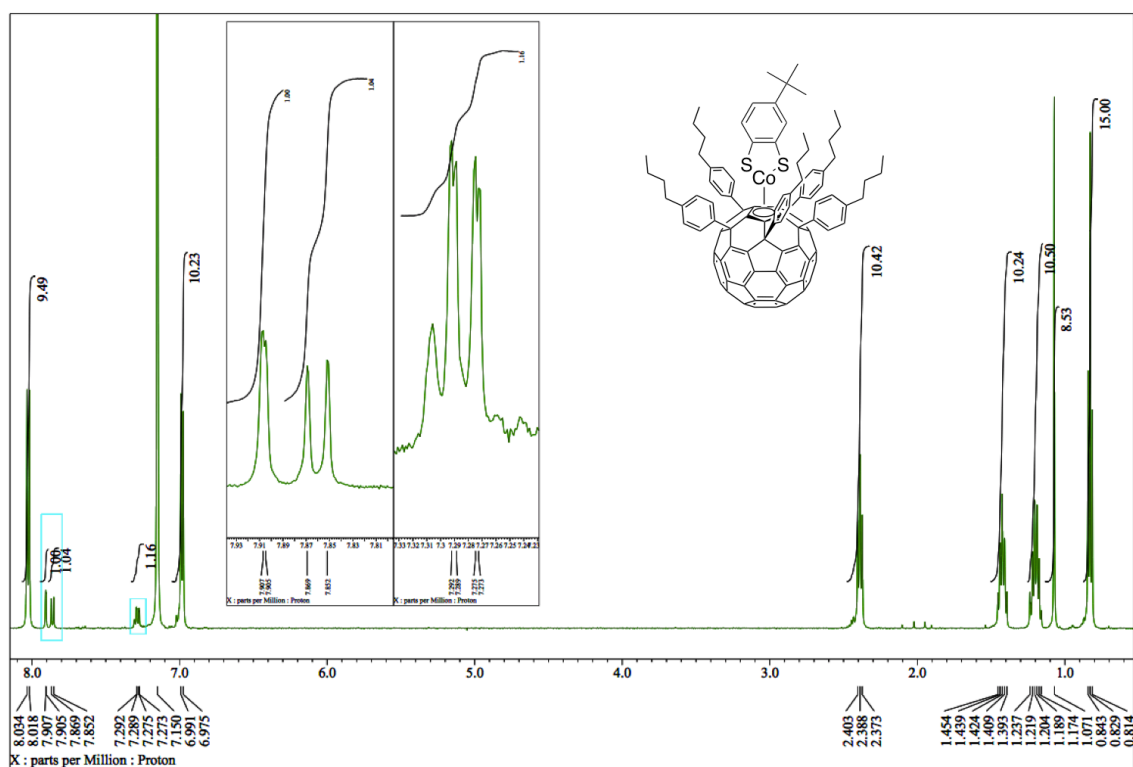

Figure S9.  $^1\text{H}$  NMR chart for 6.

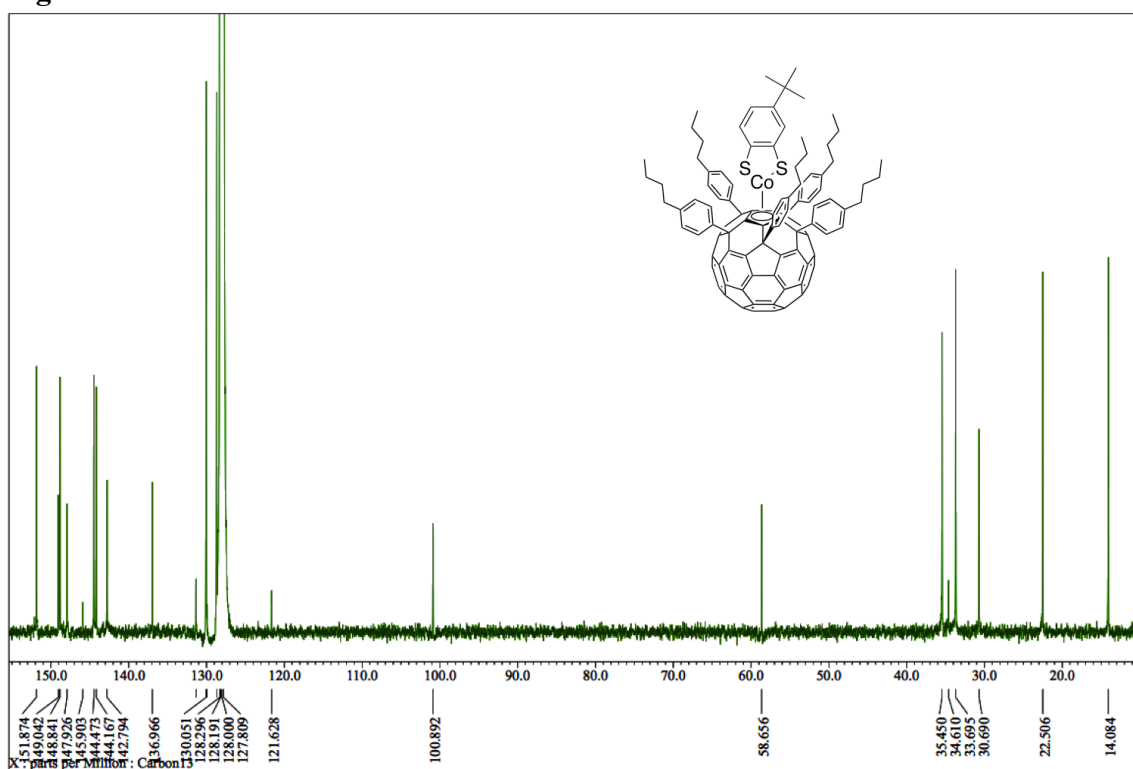

Figure S10.  $^{13}\text{C}$  NMR chart for 6.

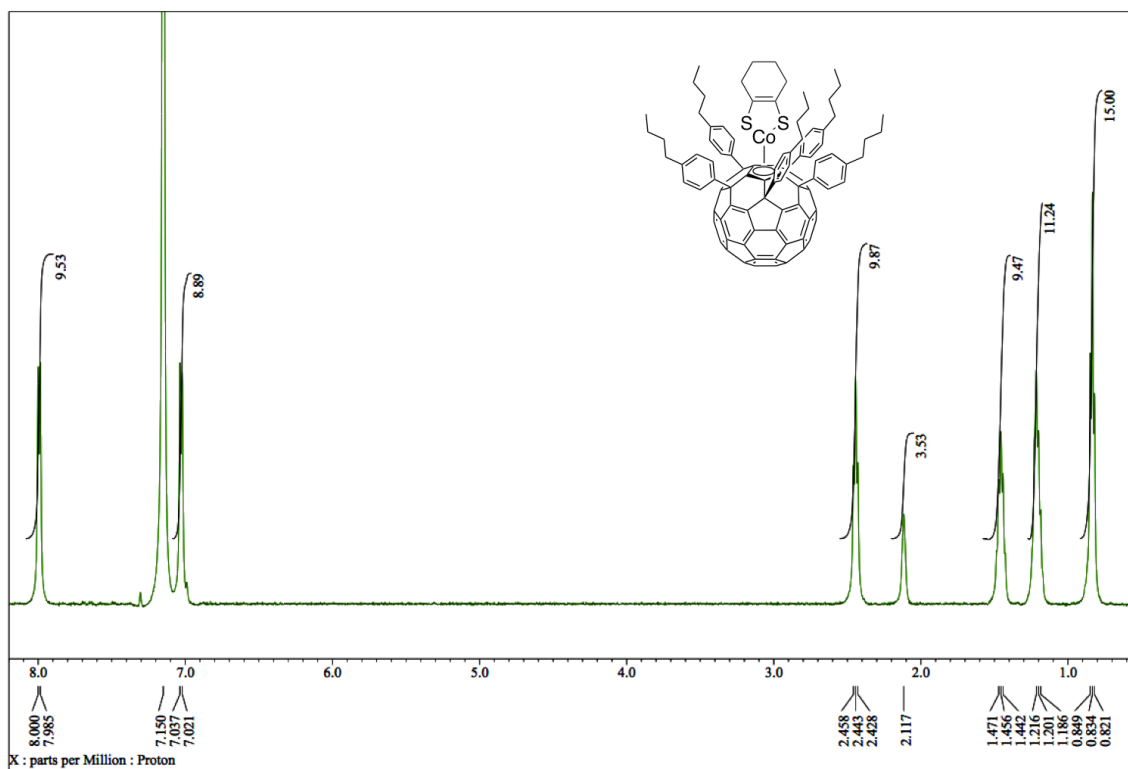

Figure S11.  $^1\text{H}$  NMR chart for 7.

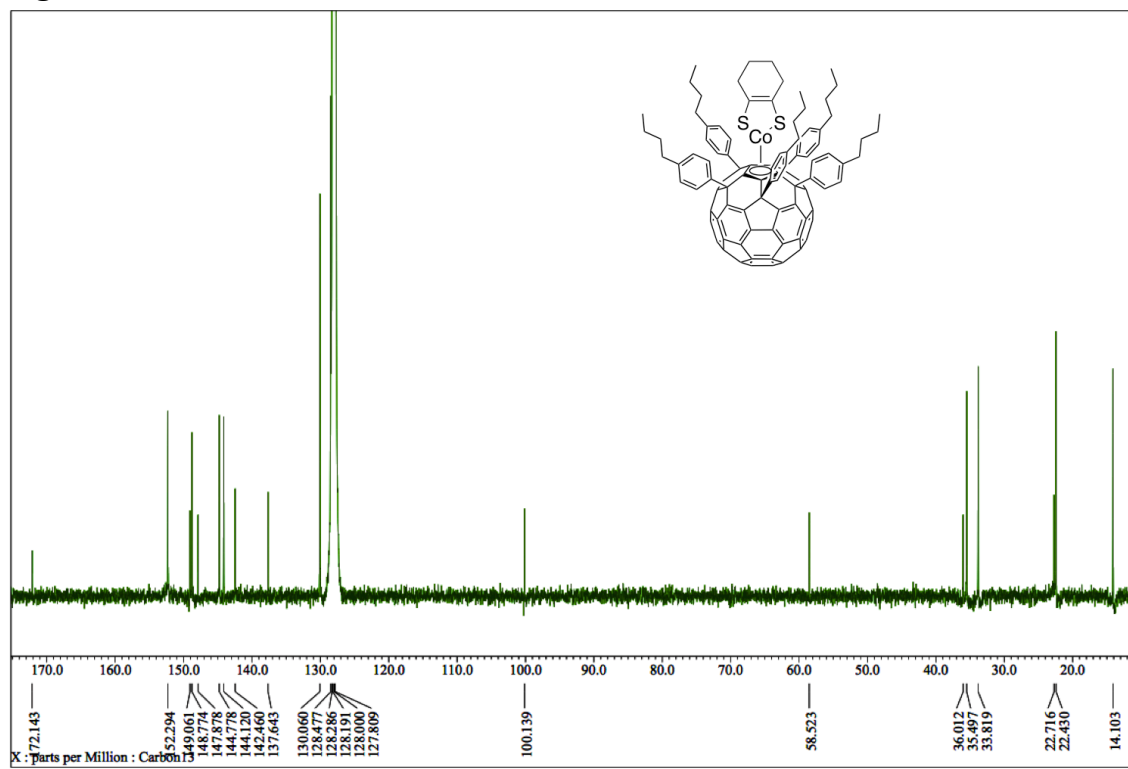

Figure S12.  $^{13}\text{C}$  NMR chart for 7.



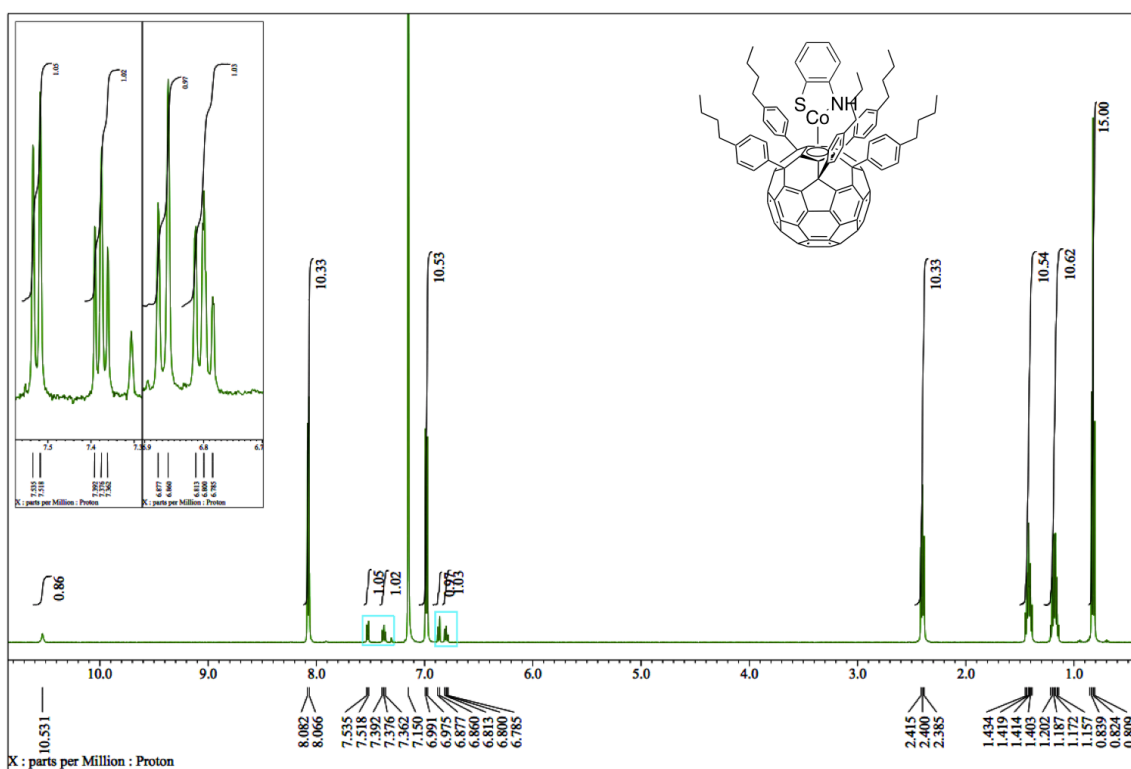

**Figure S13.** <sup>1</sup>H NMR chart for **8**.

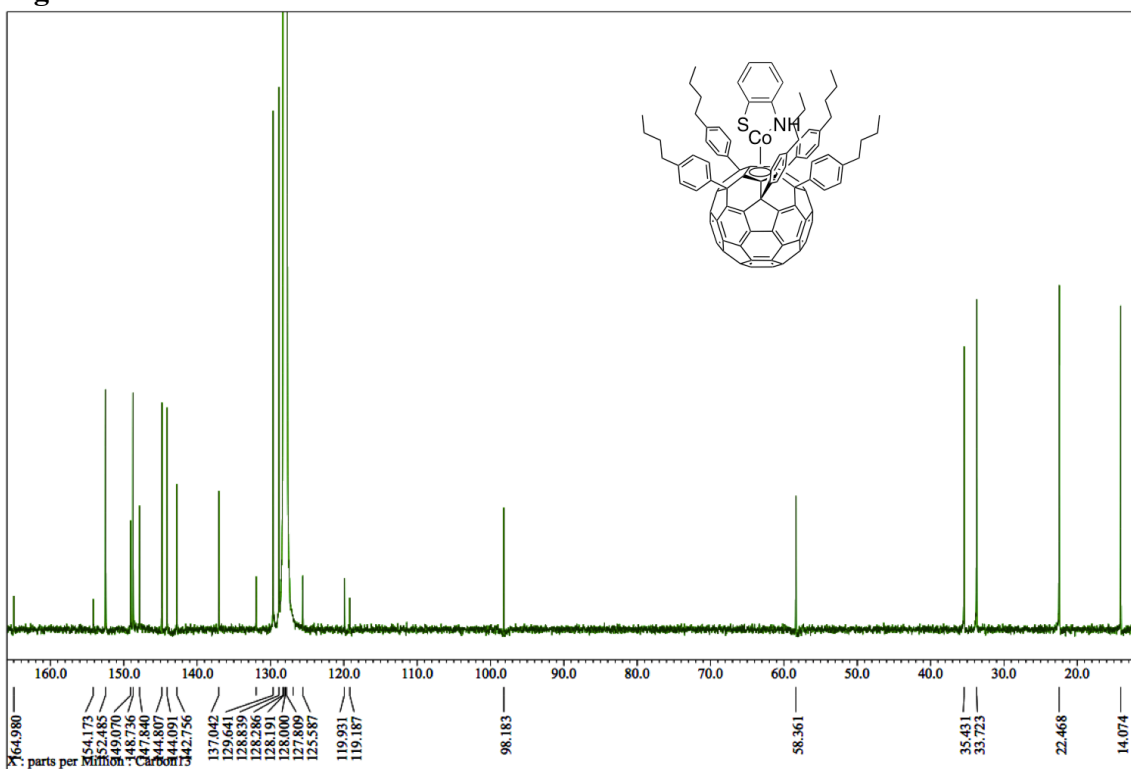

**Figure S14.** <sup>13</sup>C NMR chart for **8**.

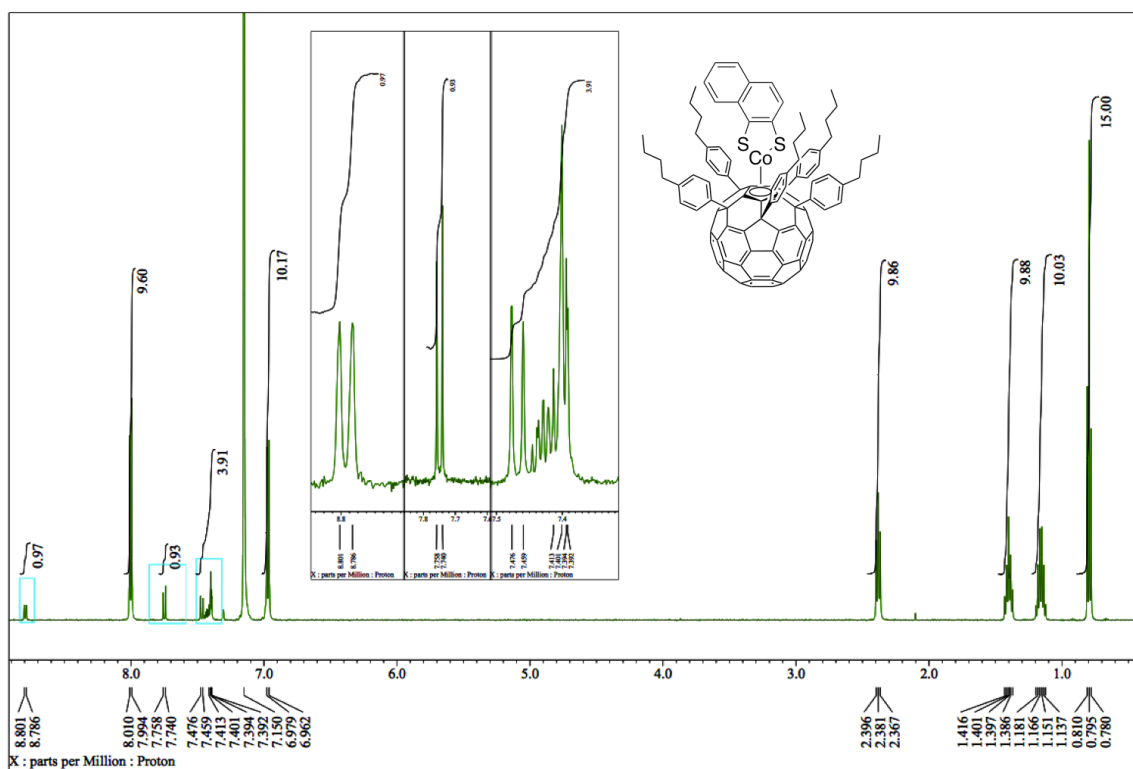

**Figure S15.** <sup>1</sup>H NMR chart for **9**.

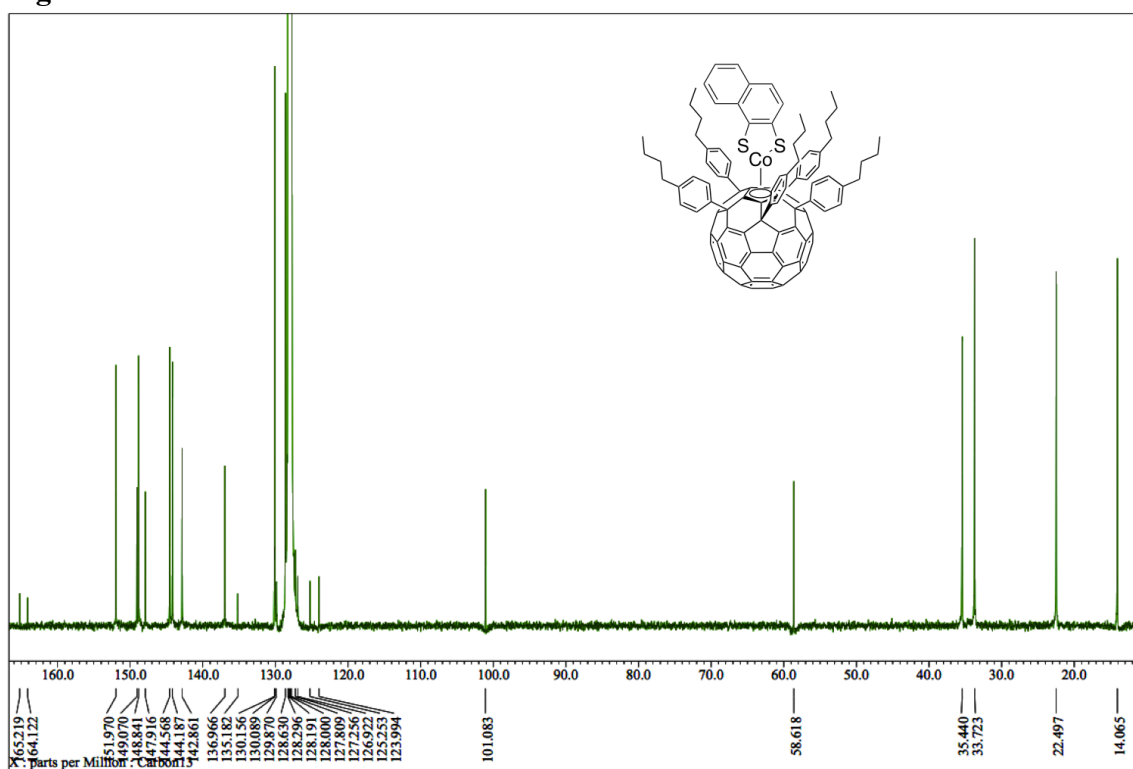

**Figure S16.** <sup>13</sup>C NMR chart for **9**.
